1 **Genome location dictates the transcriptional response to PolC-inhibition in**

2 *Clostridium difficile*

3

4 Erika van Eijk<sup>1,§</sup>, Ilse M. Boekhoud<sup>1,2,3,§</sup>, Ed J. Kuijper<sup>1,3</sup>, Ingrid M.J.G. Bos-Sanders<sup>1</sup>, George Wright<sup>4</sup>, Wiep  
5 Klaas Smits<sup>1,2,3\*</sup>

6

7 <sup>1</sup> Department of Medical Microbiology, Center for Infectious Diseases, Leiden University Medical Center,  
8 Leiden, the Netherlands; <sup>2</sup> Centre for Microbial Cell Biology, Leiden, the Netherlands; <sup>3</sup> Netherlands  
9 Centre for One Health, the Netherlands; <sup>4</sup> Acurx Pharmaceuticals, White Plains, NY, USA

10

11 Running title: *C. difficile* response to PolC-inhibition

12 Key words: RNAseq, DNA polymerase inhibitor, gene dosage, marker frequency analysis, sigma factor B,  
13 stress response, PolC

14

15 <sup>§</sup> EVE and IMB contributed equally to this study.

16 \* Corresponding author: Department of Medical Microbiology, Leiden University Medical Center, PO Box  
17 9600, 2300RC, Leiden, The Netherlands, phone: +31-71-526 1229, e-mail: w.k.smits@lumc.nl

18

19 **ORCID:** EVE: 0000-0003-3003-9822; IMB: 0000-0002-6579-7124; EJK: 0000-0001-5726-2405; IMJGBS:  
20 N/A; GW: 0000-0002-5812-6533; WKS: 0000-0002-7409-2847

21

22 **Abstract**

23 *Clostridium difficile* is a potentially lethal gut pathogen that causes nosocomial and community acquired  
24 infections. Limited treatment options and reports of reduced susceptibility to current treatment  
25 emphasize the necessity for novel antimicrobials. The DNA-polymerase of gram-positive organisms is an  
26 attractive target for the development of antimicrobials. ACX-362E (*N*<sup>2</sup>-(3,4-Dichlorobenzyl)-7-(2-[1-  
27 morpholinyl]ethyl)guanine; MorE-DCBG) is a DNA polymerase inhibitor in pre-clinical development as a  
28 novel therapeutic against *C. difficile* infection. This synthetic purine shows preferential activity against *C.*  
29 *difficile* PolC over those of other organisms *in vitro* and is effective in an animal model of *C. difficile*  
30 infection. In this study we have determined its efficacy against a large collection of clinical isolates. At  
31 concentrations below the minimal inhibitory concentration, the presumed slowing (or stalling) of  
32 replication forks due to ACX-362E leads to a growth defect. We have determined the transcriptional  
33 response of *C. difficile* to replication inhibition and observed an overrepresentation of up-regulated  
34 genes near the origin of replication in the presence of PolC-inhibitors, but not when cells were subjected  
35 to sub-inhibitory concentrations of other antibiotics. This phenomenon can be explained by a gene  
36 dosage shift, as we observed a concomitant increase in the ratio between origin-proximal versus  
37 terminus-proximal gene copy number upon exposure to PolC-inhibitors. Moreover, we show that certain  
38 genes differentially regulated under PolC-inhibition are controlled by the origin-proximal general stress  
39 response regulator sigma factor B. Together, these data suggest that genome location both directly and  
40 indirectly determines the transcriptional response to replication inhibition in *C. difficile*.

41

42

43

44

45

## 46 **Background**

47 *Clostridium difficile* (*Clostridioides difficile* (1)) is a gram-positive, anaerobic bacterium that can  
48 asymptotically colonize the intestine of humans and other mammals (2-4). However, when the  
49 normal flora is disturbed *C. difficile* can overgrow and cause fatal disease, as has been dramatically  
50 demonstrated in the Stoke Mandeville Hospital outbreaks in 2004 and 2005 (5). The ability to form  
51 highly resistant endospores coupled to its extensive antibiotic resistance have contributed to its success  
52 as a nosocomial and community acquired pathogen (2-4). Recent years have seen an increase in the  
53 incidence and severity of *C. difficile* infections (CDI), due to the emergence of certain PCR ribotypes (3,  
54 6). Antibiotic use is a well-established risk factor for CDI (7), and the emergence of the epidemic PCR  
55 ribotype 027 has been linked to fluoroquinolone resistance (8). At present two antibiotics,  
56 metronidazole and vancomycin are commonly used to treat CDI and a third, fidaxomicin, is indicated for  
57 the treatment of relapsing CDI (9, 10). Clearly, limited treatment options and reports of reduced  
58 susceptibility to current treatment (11-13) emphasize the necessity for the development of novel  
59 antimicrobials and a better understanding of tolerance and resistance towards existing therapeutics.

60 It is increasingly realized that off-target effects that occur when cells are exposed to  
61 antimicrobials can contribute to their efficacy, but also facilitate the emergence of tolerance and/or  
62 resistance (14). Antimicrobials may act as signaling molecules which modulate gene expression (14).  
63 Additionally, in particular those targeting DNA replication (such as polymerase inhibitors) can cause  
64 transcriptional effects as a result of differences in gene dosage (15).

65 The polymerase of gram-positive organisms is an attractive target for the development of novel  
66 antimicrobials (16). First, these PolC-type polymerases are absent from gram-negative organisms and  
67 humans (17, 18). HPUra, one of the first such compounds, is therefore highly active against a wide range  
68 of gram-positive bacteria, but does not affect gram-negative bacteria (17, 18). Template-directed  
69 elongation is blocked by the inhibitor through simultaneous binding to the cytosine of the DNA strand

70 and near the active site of PolC. Second, compounds can be derived that have an increased specificity  
71 towards specific microorganisms. ACX-362E (**Figure 1**) is a compound in pre-clinical development as a  
72 novel therapeutic against *C. difficile* as it shows preferential activity against *C. difficile* PolC over those  
73 of other organisms *in vitro* (19, 20), and will progress to clinical trials in the near future (Acurx  
74 Pharmaceuticals, personal communication). PolC-inhibitors can cause a stress response and cell death  
75 after prolonged exposure. In *Bacillus subtilis*, this stress is characterized by a combination of DNA  
76 damage (SOS) response, and an SOS-independent pathway dependent on the DNA replication initiator  
77 DnaA (21, 22). In *Streptococcus pneumoniae* cells, devoid of an SOS-response, competence for genetic  
78 transformation is induced upon replication stress (23). The response of *C. difficile* to this particular class  
79 of compounds is unknown.

80 In this study, we characterized aspects of the action of PolC-inhibitors towards *C. difficile*.  
81 Minimal inhibitory concentrations for HPUra and ACX-362E were determined using agar dilution for a  
82 large collection of clinical isolates. Next, we investigated the effects of sub-inhibitory levels of PolC-  
83 inhibitors on growth of *C. difficile* in liquid medium and performed RNAseq analyses to determine the  
84 transcriptional response to PolC-inhibitors in our laboratory strain 630 $\Delta$ erm. Finally, marker frequency  
85 analysis and transcriptional reporters were used to provide a mechanistic explanation for the observed  
86 up-regulation of origin-proximal genes under conditions of replication inhibition.

87

## 88 **Results**

### 89 *ACX-362E is a potent inhibitor of diverse clinical isolates of C. difficile*

90 To date, reports on activity of PolC-inhibitors towards *C. difficile* are limited. For only 4 and 23 *C. difficile*  
91 strains minimal inhibitory concentrations were published (19, 20), and no analysis was performed on  
92 possible differences in efficacy between various phylogenetic groups (24, 25). Therefore, we assessed

93 the sensitivity of a diverse collection of *C. difficile* clinical isolates towards PolC-inhibitors and  
94 determined if ACX-362E was indeed superior to the general PolC-inhibitor HPUra.

95 HPUra and ACX-362E were tested by the agar dilution method, according Clinical and Laboratory  
96 Standards Institute (CLSI) guidelines for testing of antimicrobial susceptibility of anaerobes (26, 27),  
97 against 364 *C. difficile* clinical isolates collected earlier in the framework of a pan-European study (6, 28).

98 We found that ACX-362E (MIC<sub>50</sub>: 2 µg/ml; MIC<sub>90</sub>: 4 µg/ml) demonstrates lower inhibitory  
99 concentrations than the general gram-positive PolC-inhibitors HPUra (MIC<sub>50</sub>: 16 µg/ml; MIC<sub>90</sub>: 32 µg/ml)  
100 (**Figure 2, Supplemental Table 1**), consistent with previous *in vitro* activities against purified PolC (19).  
101 We observed no significant difference in ACX-362E susceptibility between clades (**Table 1**) and the  
102 different PCR ribotypes demonstrated a similar distribution in MIC values (data not shown). No growth  
103 at the highest concentration of compounds tested (resistance) for either one of the PolC-inhibitors was  
104 observed among the clinical isolates tested (N=363). Notably, we observed only a 2-fold difference in  
105 MIC<sub>50</sub> and MIC<sub>90</sub> indicating that the compounds have similar activity against nearly all strains. In  
106 contrast, the gram-negative obligate anaerobe *Bacteroides fragilis* was resistant to both polymerase  
107 inhibitors under the conditions tested (MIC >265 µg/ml), as expected for an organism lacking PolC. The  
108 gram-positive bacterium *Staphylococcus aureus*, which was included as a control for the activity of  
109 HPUra against this group of bacteria (16, 29), was sensitive to both HPUra and ACX-362E, with MIC  
110 values of 2 µg/mL and 1 µg/mL, respectively.

111 We conclude that ACX-362E is highly active against diverse clinical isolates of *C. difficile* and  
112 resistance is not a concern in currently circulating strains.

113

#### 114 *Treatment with ACX-362E leads to a pleiotropic transcriptional response*

115 In order to determine the transcriptional response of PolC-inhibitors, we established the optimal  
116 concentration of both inhibitors which affected growth of *C. difficile* in liquid medium. The laboratory

117 strain *C. difficile* 630 $\Delta$ erm (PCR ribotype 012, MLST Clade 1)(30, 31) was grown in medium with varying  
118 amounts of HPUra (10-40  $\mu$ g/mL) or ACX-362E (0.25-8  $\mu$ g/mL). We note that concentrations up to the  
119 MIC<sub>90</sub> (as determined by agar dilution) did not lead to a complete growth arrest in liquid medium in the  
120 time course of the experiment (**Supplemental Figure 1**). A difference between MIC values from agar  
121 dilution and (micro)broth has been observed before (32). The growth kinetics of *C. difficile* under the  
122 influence of varying concentrations of HPUra was marginally affected when using concentrations from  
123 10-40  $\mu$ g/ml, at >80 percent of the non-treated culture. Growth kinetics of cultures containing PolC-  
124 inhibitor ACX-362E 1-8  $\mu$ g/ml were similar and resulted in -30-40 percent reduced growth compared to  
125 the untreated culture. For subsequent experiments we used concentrations of PolC-inhibitors that were  
126 at or close to the MIC<sub>90</sub> (**Table 1**) and that result in a maximum reduction in growth of 30% compared to  
127 a non-treated culture (**Supplemental Figure 1**).

128 Above, we established that growth of *C. difficile* is partially inhibited at certain concentrations of  
129 PolC-inhibitors. Slowing down or stalling of replication forks might lead to a stressed state, as observed  
130 for other organisms (22, 23). As nothing is known about the effect of replication inhibition on the  
131 physiology of *C. difficile*, we determined the transcriptional response to replication inhibition by sub-MIC  
132 levels of PolC-inhibitors through strand-specific RNA sequencing (RNA-Seq).

133 *C. difficile* 630 $\Delta$ erm was grown for 5h in medium with HPUra (35  $\mu$ g/mL) or ACX-362E (4  $\mu$ g/mL)  
134 starting from an OD<sub>600</sub> of 0.05 after which cells were harvested for RNA isolation. Purified RNA was  
135 converted to cDNA and used for RNA-Seq as described in the Materials and Methods. For ACX-362E, 722  
136 genes were differentially expressed, of which 438 genes were up-regulated and 284 genes were down-  
137 regulated. The number of differentially expressed genes in HPUra treated samples was approximately 2-  
138 fold lower: 360, of which 124 genes were up-regulated and 236 genes were down-regulated. The full list  
139 of differentially regulated genes is available as **Supplementary Table 2** and the top 10 of up- and down-

140 regulated genes are shown in **Table 2** (HPUra) and **Table 3** (ACX-362E). Here, we highlight three aspects  
141 of the results.

142 First, we performed a Gene Set Enrichment Analysis (GSEA)(33) via the Genome2D web server  
143 (34) using the locus tags of the differentially regulated genes (**Supplementary Table 1**) as input. Among  
144 the genes up-regulated by ACX-362E, there is a strong overrepresentation of those involved in  
145 translation, ribosome structure and ribosome biogenesis. Not unexpectedly, also replication,  
146 recombination and repair processes are affected. This suggests that genes from these pathways show a  
147 coordinated response in the presence of ACX-362E. Among the genes down-regulated in the presence of  
148 ACX-362E, the levels of significance for specific processes are generally much lower, suggesting that  
149 there is a more heterogeneous response among genes from the same pathway. Nevertheless, metabolic  
150 pathways (especially carbon metabolism and coenzyme A transfer) and tellurite resistance were found  
151 to be significantly affected. Strikingly, a GSEA analysis on lists of genes that are differentially expressed  
152 in the presence of HPUra revealed similar processes to be affected.

153 The findings from the GSEA analysis prompted us to evaluate the overlap in the lists of  
154 differentially regulated genes between the ACX-362E and HPUra datasets in more detail. If both  
155 compounds act via a similar mechanism, we expect a conserved response. Indeed, we observe that  
156 >90% of the genes that are up-regulated in the presence of HPUra compared to the non-treated  
157 condition, are also identified as up-regulated in the presence of ACX-362E (**Figure 3A**). Though the  
158 overlap is not as strong for the down-regulated genes, we find that >30% of the genes affected by HPUra  
159 are also identified as affected by ACX-362E (**Figure 3B**). Notably, the directionality of the response is  
160 conserved, as no genes were found to be up-regulated in one but down-regulated in the other  
161 condition. Based on these observations, we believe that the differentially expressed genes identified in  
162 this study are representative for a typical response to inhibition of PolC in *C. difficile*.

163 Finally, we related the changes in transcription to genome location. *C. difficile* has a single  
164 circular chromosome and one origin of replication (*oriC*) from which the process of DNA replication  
165 occurs bi-directionally towards the terminus (*terC*) (**Figure 4A**). Though neither *oriC* nor *terC* has been  
166 definitively defined for *C. difficile*, it is assumed that *oriC* is located at or near *dnaA* (CD0001;  
167 CD630DERM\_RS00005). The terminus region is generally located at the inflection point of a GC skew ( $[G$   
168  $- C]/[G + C]$ ) plot. Such a plot places the *terC* region around 2.2Mb from CD0001, near the CD1931  
169 (CD630DERM\_RS10465) open reading frame (**Figure 4A**) (35). We noted that the differential expression  
170 appeared to correlate with genome location (**Table 2, Table 3** and **Supplemental Table 2**): many of the  
171 up-regulated genes have either low or high gene identifiers (CD numbers) indicative of an origin  
172 proximal location and, conversely, many of the down-regulated genes appear to be located away from  
173 *oriC*. Though this correlation is not absolute, we observed a clear trend when plotting the mean fold-  
174 change against genome location for all genes (**Figure 4B**).

175 Overall, our data shows that inhibition of DNA replication by PolC-inhibitors causes a consistent  
176 and pleiotropic transcriptional response that is at least in part is directly dictated by genome location.

177

#### 178 *Gene dosage shift occurs at sub-inhibitory concentration of ACX-362E PolC-inhibitor*

179 A possible explanation for the relative up-regulation of *oriC*-proximal genes and down-regulation of  
180 *terC*-proximal genes is a gene dosage shift (36-38), due to the fact that PolC-inhibition slows down  
181 replication elongation but does not prevent re-initiation of DNA replication (23, 39). To determine if this  
182 in fact occurs in *C. difficile* when replication elongation is inhibited, we performed a marker frequency  
183 analysis (MFA) to determine the relative abundance of an origin proximal gene relative to terminus  
184 proximal gene on chromosomal DNA isolated from treated and untreated cells.

185 We designed qPCR probes against the CD0001 and CD1931 regions, representing *oriC* and *terC*,  
186 respectively (31, 35). Using these probes, we could show that *C. difficile* demonstrates multi-fork



187 replication in exponential growth phase and that the MFA assay detects the expected decrease in  
188 *oriC:terC* ratio when cells enter stationary growth phase (data not shown). Next, we analyzed the effects  
189 of PolC-inhibitors on the *oriC:terC* ratio. When cells were treated with HPURA (35  $\mu\text{g}/\text{mL}$ ), the MFA  
190 showed a modest increase in *oriC:terC* ratio of 2,6-fold compared to untreated cells. However, when  
191 cells were treated with ACX-362E (4  $\mu\text{g}/\text{ml}$ ), the MFA showed a >8-fold increase in the *oriC:terC* ratio  
192 compared to untreated cells. In contrast, such an increase was not observed for cells treated with  
193 metronidazole (0.25  $\mu\text{g}/\text{mL}$ ; a DNA damaging agent), fidaxomicin (0.00125  $\mu\text{g}/\text{mL}$ ; an RNA polymerase  
194 inhibitor) or surotomycin (0.625  $\mu\text{g}/\text{mL}$ ; a cell-wall synthesis inhibitor) (**Figure 5**) or chloramphenicol (2  
195  $\mu\text{g}/\text{mL}$ ; a protein synthesis inhibitor)(**Supplemental Figure 2**).

196 We conclude that inhibition of PolC-activity, but not the actions of any of the other tested  
197 antimicrobials, leads to a gene dosage shift in *C. difficile*.

198

#### 199 *Origin proximal sigB contributes to the transcriptional response*

200 Elegant work in *S. pneumoniae* has shown that the transcriptional response to replication inhibition can  
201 also be affected by origin-proximal regulators that respond to the gene dosage effect (23). In *C. difficile*  
202 the gene encoding the general stress response sigma factor  $\sigma^B$  (*sigB*, CD0011) is located close to the  
203 origin of replication (40). We wondered whether this regulator contributes to the transcriptional effects  
204 observed in our studies.

205 First, we compared the list of differentially regulated genes from our study (**Supplemental Table**  
206 **2**) to those under the control of  $\sigma^B$  (41). In contrast to most anaerobic gram-positive organisms, *C.*  
207 *difficile* encodes a homolog of the general stress response sigma factor,  $\sigma^B$  (40, 42). A transcriptome  
208 analysis comparing *sigB* mutant versus wild type cells was recently published (41). Strikingly, we find  
209 ~40% of the genes (21/58) identified as involved in stress response under the control of  $\sigma^B$  to be  
210 differentially expressed in our ACX-362E dataset (**Supplemental Table 3**). Similarly, we observed that

211 7/20 (~35%) of the genes containing a transcriptional start site with a  $\sigma^B$  consensus sequence are  
212 differentially expressed in our ACX-362E dataset (**Supplemental Table 3**). These data suggest that the  
213 response to DNA replication inhibition is at least partially dependent on  $\sigma^B$ .

214 To demonstrate that exposure to ACX-362E causes a transient up-regulation of *sigB*, we  
215 constructed a reporter fusion of the secreted luciferase reporter sLuc<sup>opt</sup> with the predicted promoter of  
216 the *sigB* operon (*P<sub>cd0007</sub>*). We monitored luciferase activity of a strain harboring a plasmid containing this  
217 reporter fusion (WKS2003) after dilution of an overnight culture into fresh medium with or without ACX-  
218 362E (**Figure 6**). In non-treated cells, expression from the *sigB* promoter is relatively stable over the  
219 course of 5.5h. By contrast, luciferase activity strongly increases from 1.25h to 3h after inoculation into  
220 medium with ACX-362E. These data show that exposure to ACX-362E transiently induces transcription of  
221 the *sigB* operon.

222 Next, a *sigB* mutant was constructed using Allele-Coupled Exchange (43) as described in the  
223 Materials and Methods. The chromosomal deletion of *sigB* and absence of  $\sigma^B$  protein was verified by  
224 PCR and Western Blot, respectively (**Supplemental Figure 3**). To directly demonstrate a role for *sigB* in  
225 the regulation of genes with altered transcription upon PolC-inhibition, we fused the predicted  
226 promoter regions of selected genes to a secreted luciferase reporter (44) and evaluated luminescence in  
227 wild type and *sigB* mutant backgrounds, after 5-hour growth in the presence and absence of 4  $\mu\text{g}/\text{mL}$   
228 ACX-362E. All genes tested demonstrated a significant increase in promoter activity in a wild type  
229 background in the presence of ACX-362E compared to the non-treated control, validating the results  
230 from the RNA-Seq analysis (**Figure 7**). Three distinct patterns were observed. For CD0350 (encoding a  
231 hypothetical protein) and CD3963 (encoding a putative peptidoglycan-binding exported protein) there  
232 was virtually no expression in a *sigB* mutant background (**Figure 7A and B**). We conclude that these  
233 genes are strictly dependent on  $\sigma^B$  for their expression under the conditions tested. CD3614 (encoding a  
234 hypothetical protein) shows a basal level of expression, but no significant increase in transcription levels

235 in the presence of ACX-362E in a *sigB* mutant background compared to the non-treated control (**Figure**  
236 **6C**). This suggests that the transcriptional up-regulation under these conditions is  $\sigma^B$  dependent, and  
237 indicates that the basal level of transcription observed is likely independent of  $\sigma^B$ . Finally, CD3412 (*uvrB*,  
238 encoding a subunit of an excinuclease) shows reduced transcriptional up-regulation in ACX-362E treated  
239 cells compared to non-treated controls (**Figure 6D**). Thus, the transcription of this particular gene under  
240 conditions of ACX-362E exposure is brought about by both a  $\sigma^B$ -dependent and a  $\sigma^B$ -independent  
241 regulatory pathway.

242 Together, these results demonstrate that *sigB* controls the expression of at least a subset of  
243 genes that are up-regulated under PolC-inhibition

244 **Discussion**

245

246 *Resistance to PolC-inhibitors and specificity of ACX-362E*

247 Limited treatment options and reports of reduced susceptibility to current treatment (11, 12, 45)

248 emphasize the necessity for the development of novel antimicrobials. As CDI can be induced by use of

249 broad spectrum antibiotics (7), new antimicrobials ideally should only target *C. difficile*, thereby

250 maintaining integrity of the colonic microbiota. In this study, we have tested inhibitors HPURa and ACX-

251 362E which specifically target the PolC enzyme, essential for DNA replication. The majority of PolC-

252 inhibitors target gram-positive bacteria with low G+C content, but ACX-362E has been reported to

253 demonstrate increased specificity towards *C. difficile* PolC *in vitro* and showed promising results for the

254 efficacy *in vivo* based on a limited set of *C. difficile* strains (19, 20). The compound will progress to

255 clinical trials in the near future (Acurx Pharmaceuticals, personal communication). The present study, is

256 the largest survey of the efficacy of HPURa and ACX-362E against a large collection of clinical isolates

257 consisting of many relevant PCR ribotypes to date. We have established that ACX-362E demonstrated

258 lower inhibitory concentrations than the general gram-positive PolC-inhibitor HPURa in agar dilution

259 experiments. The MIC<sub>50</sub> and MIC<sub>90</sub> of ACX-362E are similar to those of antimicrobials commonly used to

260 treat *C. difficile* infection (metronidazole: MIC<sub>50</sub> = 2 ug/mL and MIC<sub>90</sub> = 4 ug/mL; vancomycin MIC<sub>50</sub> = 2

261 ug/mL and MIC<sub>90</sub> = 4 ug/mL (20); fidaxomicin = MIC<sub>50</sub> = 0.125 ug/mL and MIC<sub>90</sub> = 0.5 ug/mL (46)). We did

262 not detect a significant difference in MICs between clades and ribotypes, demonstrating that PolC-

263 inhibitors have the potential to be used as treatment for the majority - if not all - circulating *C. difficile*

264 strains. This includes the epidemic types of PCR ribotype 027 and 078 (8, 47). These results are in line

265 with other work that demonstrated only 2- to 4-fold differences in antimicrobial susceptibility between

266 different clades for metronidazole, fidaxomicin and semi-synthetic thiopeptide antibiotic LFF571 (28). In

267 the course of our experiments, we did not find any strains that grew at the highest concentrations of

268 either HPUra or ACX-362E tested. We cannot exclude rare pre-existing/intrinsic resistance, or the  
269 development of resistance in strains over time, for instance through multi-drug exporters, but at present  
270 there is no evidence for this. PolC-inhibitors are competitive inhibitors of polymerase activity by binding  
271 in the active site. Mutations that abolish binding of HPUra or ACX-362E are likely to affect the essential  
272 enzymatic activity of the polymerase and for that reason unlikely to occur *in vivo*. A single mutation  
273 (*azp-12*) has been described in *B. subtilis* that confers resistance to HPUra (48). This T>G transversion  
274 results in the replacement of a serine with an alanine in the highly conserved PFAM07733 domain of  
275 the polymerase (49). To our knowledge, it is unknown whether this mutation prevents binding of HPUra  
276 to PolC of *B. subtilis*. Few other mutations have been described that confer resistance against other  
277 PolC-inhibitors (50, 51). It will be of interest to see if similar mutations in *C. difficile* result in resistance  
278 to HPUra and/or ACX-362E and what the effect on binding of these compounds to *C. difficile* PolC is.

279 ACX362 may have off-target effects unrelated to its replication-inhibitory activity For *C. difficile*,  
280 it has not been established that PolC inhibition is the sole mode of action of the inhibitors. In our  
281 experiments, we found that *S. aureus* was sensitive to both HPUra and ACX-362E and even more so than  
282 *C. difficile*. It should be established if this is due to inhibition of PolC or mediated by an alternative  
283 mechanism. If ACX-362E targets DNA replication in *S. aureus*, we would also expect to find an increase in  
284 *oriC:terC* ratio upon ACX-362E exposure in this organism.ACX-362EACX-362E Alternatively, ACX-362E  
285 may also affect the activity of the other PolIII-type polymerase, DnaE, in *S. aureus*. PolIII-inhibitors can  
286 affect PolC, DnaE or both (51), though *in vivo* activity appears to correlate with PolC-inhibition. Both *C.*  
287 *difficile* and *S. aureus* possess PolC and DnaE polymerase, but the DnaE enzymes are of different families  
288 (DnaE1 in *C. difficile* and DnaE3 in *S. aureus*) (52). To verify the mode of action, and whether a ACX-  
289 362Edifferent DnaE-type polymerases explain the increased sensitivity of *S. aureus* compared to *C.*  
290 *difficile*, the activity of ACX-362E towards purified DnaE and PolC from both organisms should be  
291 determined..

292            Though it is clear that ACX-362E inhibits *C. difficile* efficiently and shows limited activity towards  
293 certain other anaerobes (19), these findings highlight the necessity to perform additional (microbiome)  
294 studies to more clearly define the antimicrobial spectrum of this compound. It also shows that ACX-362E  
295 may have therapeutic potential outside treatment of CDI.

296

#### 297 *Regulators of the transcriptional response to PolC-inhibitors*

298 The present study is the first to describe the transcriptional response of *C. difficile* to inhibition of DNA  
299 replication. We find that ~200 genes show differential expression under conditions of PolC-inhibition by  
300 both HPura and ACX-362E, when compared to non-treated cells (**Supplemental Table 2, Figure 3**). When  
301 considering only ACX-362E, approximately 13% of all genes in the genome show statistically significant  
302 altered transcription. We demonstrate that this large reprogramming of transcription is likely to be  
303 caused directly by a gene dosage shift (**Figure 4 and 5**).

304            In addition to direct effects, it is conceivable that at least part of the transcriptional response is  
305 indirect. Our list of differentially regulated genes includes several putative regulators; sigma factors  
306 (including *sigE*, *sigG* and *sigH*), transcription factors and anti-terminators. The relatively long time (5h) at  
307 sub-MIC levels of antimicrobials may have contributed to secondary effects, through one or more of  
308 these regulators. Though shorter induction times are thought to provoke more compound-specific  
309 responses (53), we did observed a highly consistent transcriptional signature with both HPura and ACX-  
310 362E (**Supplemental Table 2, Figure 3**).

311            Major stress response pathways are poorly characterized in *C. difficile*. On the basis of  
312 experiments in other organisms (21-23, 54-56), we expect that inhibition of DNA replication inhibition  
313 might possibly induce an SOS response (LexA)(57), a DnaA-dependent transcriptional response (21), and  
314 possibly a heat shock response (HrcA/CtsR)(58) and/or a general stress response ( $\sigma^B$ )(42). Of these, the  
315 best characterized stress response pathway in *C. difficile* is the one governed by  $\sigma^B$  (41). We noted a

316 significant overlap in putatively  $\sigma^B$ -dependent genes and those differentially expressed upon exposure  
317 to PolC-inhibitors (**Supplemental Table 2**). In addition, our luciferase reporter fusions directly implicate  
318 *sigB* in the expression and/or up-regulation of some of these (**Figure 7**). It should be noted that the *sigB*-  
319 operon itself was not differentially expressed in our RNA-seq analysis. A *sigB*-reporter fusion suggests  
320 that *sigB* is transiently up-regulated prior to the time point of sampling for the RNA-Seq analysis (**Figure**  
321 **6**). Similar transient up-regulation of *sigB* followed by a persistent response of  $\sigma^B$ -dependent gene  
322 expression has been observed in other organisms (58-60). To our knowledge, this is the first indication  
323 that *sigB*- and SigB-dependent gene expression could be subject to a gene-dosage effect.

324 To date, no genes have been identified that are regulated by DnaA in *C. difficile* and direct  
325 regulation of genes through the other stress response pathways has not been demonstrated. Putative  
326 LexA-regulated genes of *C. difficile* were identified *in silico* (61) and some of these (such as the *uvr*  
327 excinuclease and 30S ribosomal protein S3) were differentially expressed in our dataset (**Supplemental**  
328 **Table 2**). Indeed, we find that only part of the transcriptional up-regulation of *uvrB* as a result of ACX-  
329 362E exposure could be explained by *sigB* (**Figure 7D**), and LexA-dependent regulation might play a role.  
330 Pleiotropic phenotypes have been described for a *C. difficile* *lexA* mutant (62) and it is likely that other  
331 LexA targets than those identified *in silico* exist. No mutants of *hrcA* or *ctsR* have been described for *C.*  
332 *difficile*, but transcriptome and proteome analyses have been performed with heat shocked cells (42°C  
333 (60), or 41°C (59, 63, 64)). Similarities between these datasets and ours include genes encoding proline  
334 racemase (*prdF*), chaperones (*groEL*, *groES*), thioredoxin systems (*trxA*, *trxB*) and Clp-proteases (*clpC*,  
335 *clpP*).

336 Many parameters (such as the medium used, cell density, concentration of antibiotics, and  
337 protocol used to arrest transcription between cell harvest and lysis) can influence overall transcription  
338 signatures, and can also govern an incomplete overlap between our data and the stress regulons  
339 determined by others (53).

340

341 *Genome location contributes to the transcriptional response to PolC-inhibition*

342 Our analysis of differential regulation in relation to genome location revealed a striking pattern of  
343 relative up-regulation for *oriC*-proximal genes, and down-regulation for *terC*-proximal genes under  
344 conditions of PolC inhibition (**Figure 4**). Antimicrobials directed at DNA replication in bacteria have a  
345 profound negative effect on the processivity of replication forks, though initiation of DNA replication is  
346 not or only marginally affected (23, 39). As a consequence, the presence of multiple replication forks  
347 simultaneously increases the copy numbers of genes located in close proximity of the origin of  
348 replication and such a gene dosage differences can result in functionally relevant transcriptional  
349 differences, either directly or indirectly (15). We found an increase of *oriC:terC* ratio when performing  
350 MFA on chromosomal DNA of cells subjected to a sub-inhibitory concentration of ACX-362E (and HPUra,  
351 albeit less pronounced) (**Figure 5**), consistent with findings in other organisms (23). This is the first  
352 demonstration of gene-dosage dependent transcriptional regulation in *C. difficile*.

353 An example of direct regulation by gene dosage can be found in *Vibrio*, for instance, where the  
354 location of ribosomal protein clusters close to the origin is crucial for fast growth, because increased  
355 copy number under condition of multi-fork replication allows for higher expression levels (65). We note  
356 that ribosomal gene clusters are up-regulated when DNA replication is inhibited in our experiments  
357 (**Table 2, Table 3, Supplemental Table 2**), suggesting that a similar mechanism may be active in *C.*  
358 *difficile*.

359 An example of indirect regulation as a result of gene dosage is the induction of competence  
360 genes in *S. pneumoniae* (23). Competence is believed to be a stress response in this organism, that lacks  
361 a canonical ( $\sigma^B$ -dependent) stress response pathway. Key regulatory genes for competence  
362 development are located close to the origin, and replication inhibition therefore leads to the induction  
363 of origin distal competence genes (23). In our experiments, the large overlap with the proposed  $\sigma^B$



364 regulon (41), the origin proximal location of the *sigB* operon (8.5kb-10kb) (40) and the  $\sigma^B$ -dependence of  
365 selected differentially expressed genes suggests that at least part of the transcriptional response to  
366 PolC-inhibition can be explained by an indirect gene dosage effect. The positioning of stress-response  
367 regulators close to *oriC* may therefore be a conserved strategy in bacteria to respond to DNA replication  
368 insults that is independent of the nature of the regulator.

369         Though it is likely that an increase in gene copy number leads to an increase in transcription of  
370 these genes, it is less clear whether this is the case for the observed down-regulation. Most methods of  
371 normalization for transcriptome analyses are based on the assumption that there is no overall change in  
372 transcription or that the number of transcripts per cells is the same for all conditions and this may not  
373 be the case when a global copy number shift occurs (15). Absolute transcript levels for down-regulated  
374 genes might therefore be similar under both conditions (but lower relative to *oriC*-proximal transcripts).

375         It is interesting that certain processes are highly enriched in the list of genes up-regulated under  
376 conditions of PolC-inhibition (most notably ribosome function and DNA-related functions), whereas this  
377 is less so for the down-regulated genes. This suggests that pathways susceptible to replication  
378 dependent gene-dosage effects demonstrate a functional clustering of genes near *oriC*, whereas  
379 clustering of genes from specific pathways in the *terC*-proximal region is less pronounced. Indeed, most  
380 ribosomal gene clusters in *C. difficile* are located close to the origin of replication (31, 40) and also many  
381 genes involved in DNA replication and repair are located in these regions. Consistent with this,  
382 positioning of genes involved in transcription and translation close to the origin appears to be under  
383 strong selection as such genomes tend to be more stable (66).

384         In conclusion, both direct and indirect effects of gene dosage shifts are likely to contribute to the  
385 transcriptional response of *C. difficile* to replication inhibition.

386

387 **Materials and Methods**

388

389 *Bacterial strains and culture conditions*

390 Plasmids and bacterial strains used in this study can be found in **Table 4**. Note that this table only  
391 contains laboratory strains; the clinical isolates used for the agar dilution experiments (see below) are  
392 listed in **Supplemental Table 1**. *E. coli* was cultured aerobically at 37°C (shaking at 200 rpm) in Luria-  
393 Bertani (LB) broth supplemented with 20 µg/ml chloramphenicol and 50 µg/ml kanamycin when  
394 appropriate. *C. difficile* strains were cultured in Brain Heart Infusion (BHI) broth (Oxoid) supplemented  
395 with 0,5% yeast extract (Sigma-Aldrich), *Clostridium difficile* Selective Supplement (CDSS, Oxoid) and  
396 20µg/ml thiamphenicol when appropriate. *C. difficile* was grown anaerobically in a Don Whitley VA-1000  
397 workstation in an atmosphere of 10% CO<sub>2</sub>, 10% H<sub>2</sub> and 80% N<sub>2</sub>. Liquid cultures were grown under gentle  
398 agitation (120 rpm).

399

400 *Agar dilution*

401 HPURa and ACX-362E were tested against a collection of *C. difficile* clinical isolates. 375 clinical isolates  
402 have been collected during the ECDIS study (6). All strains were characterized by PCR ribotyping (67) and  
403 by PCR to confirm the presence of genes encoding toxins A , B and binary toxin (68-70). Of the 375  
404 clinical isolates, we excluded stocks that were found to contain more than one strain and isolates that  
405 could not be recultured. Testing was therefore performed on 363 isolates (**Supplemental Table 1**). *C.*  
406 *difficile* ATCC 700057, *B. fragilis* ATCC 25285 and *S. aureus* ATCC 29213 were used as controls (71).

407 The strains were tested for the different concentrations of antimicrobial using the agar dilution  
408 method according to Clinical & Laboratory Standards Institute guidelines (26, 27). In short, the  
409 antimicrobials were diluted into Brucella Blood Agar (BBA) supplemented with hemin and vitamin K1.  
410 Bacterial isolates were cultured on blood agar plates and after 24 hours re-suspended to a turbidity of

411 0.5 McFarland in phosphate buffered saline (PBS). The strains were inoculated onto BBA solid media  
412 containing the PolC-inhibitors using multipoint inoculators to a final concentration of  $10^4$  CFU per spot.  
413 Each series of antimicrobial agents was tested from the lowest concentration to the highest  
414 concentration. Two control plates without antibiotics were inoculated to control for aerobic  
415 contamination and purity of anaerobic growth. At the end of the final series, two control plates were  
416 inoculated to verify the final organism viability and purity. Only experiments where both positive and  
417 negative controls performed according to expectations were included. Plates were incubated  
418 anaerobically in a Don Whitley VA-1000 workstation in an atmosphere of 10% CO<sub>2</sub>, 10% H<sub>2</sub> and 80% N<sub>2</sub>  
419 and the MICs were recorded after 24 and 48 hours and are presented in the manuscript with values at  
420 48h, according to the CLSI guidelines (26).

421

#### 422 *Sub-MIC determination*

423 *C. difficile* 630Δ*erm* (30, 31) was grown in 20 mL Brain Heart Infusion (Oxoid) supplemented with 0.5%  
424 yeast extract (Sigma-Aldrich) (BHI/YE) starting from an optical density measured at 600nm (OD<sub>600</sub>) of  
425 0.05 using an exponentially growing starter culture (3 biological replicates per concentration). To  
426 determine the effects on growth at sub-inhibitory concentrations of ACX-362E, cells were cultured in the  
427 presence of the following concentrations; 0.25, 0.5, 1, 2, 4, and 8 μg/mL ACX-362E and compared to an  
428 untreated culture. To determine the effects on growth at sub-inhibitory concentrations of HPUra, cells  
429 were cultured in the presence of the following concentrations: 10, 20, 40 μg/mL HPUra and compared to  
430 an untreated culture. The OD<sub>600</sub> was monitored every hour until stationary phase was reached.

431

#### 432 *Marker Frequency analysis*

433 *C. difficile* 630Δ*erm* (30, 31) was grown in 20 mL BHI supplemented with 0.5% yeast extract with sub-  
434 MIC amounts of antimicrobials (HPUra: 35 μg/mL; ACX-362E: 4 μg/mL; metronidazole: 0.25 μg/mL;

435 fidaxomicin: 0.00125  $\mu\text{g}/\text{mL}$ , surotomycin: 0.625  $\mu\text{g}/\text{mL}$ ), starting from an  $\text{OD}_{600}$  of 0.05 using an  
436 exponentially growing starter culture. These samples were taken in the course of an independent, but  
437 simultaneously performed, set of experiments for which we obtained surotomycin and fidaxomicin from  
438 Cubist Pharmaceuticals. Metronidazole was commercially obtained (Sigma-Aldrich). We confirmed that  
439 these concentrations did not lead to a >30% reduction in growth compared to non-treated cultures  
440 (**Supplemental Figure 1** and data not shown). In parallel, cultures were grown without inhibitors from  
441 the same starter culture. All conditions were performed in biological triplicates. Previous experiments  
442 have shown that *ori:ter* differences are reliably detected >3h after dilution into fresh medium (23).  
443 Therefore, after 5 hours, 1mL cells was harvested ( $\text{OD}_{600} \sim 0.5$ ), and stored at  $-20^{\circ}\text{C}$ . Isolation of  
444 chromosomal DNA was performed the next day with the QIAamp DNA Blood Mini kit (Qiagen) according  
445 to the instructions of the manufacturer. Marker frequency analysis (MFA) was performed to assess the  
446 relative abundance of origin proximal genes relative to terminus proximal genes. As a proxy for *oriC*, a  
447 probe was designed that targets the CD0001 region (CD0001-probe-FAM). By using plots of the GC skew  
448  $([G - C]/[G + C])$  generated using DNAPlotter (72), the approximate location of the terminus region for  
449 the *C. difficile* chromosome was determined and a probe targeting this region (CD1931) was designed  
450 (CD-1931-probe-TXR). Probe design was performed with Beacon Designer<sup>TM</sup> (Premier Biosoft, Palo Alto  
451 CA, USA). Real-time PCR reactions were performed on a Biorad CFX96<sup>TM</sup> real-time PCR detection system  
452 ( $95^{\circ}\text{C}$  15 m,  $39 \times (94^{\circ}\text{C}$  30 s +  $55^{\circ}\text{C}$  30 s +  $72^{\circ}\text{C}$  30 s). Sequences for primers and probes are listed in **Table**  
453 **5**. For each biological replicate, three technical replicates were performed. Amplification efficiency was  
454 determined using standard curves obtained from DNA late stationary phase cells of strain 630 $\Delta\text{erm}$ , for  
455 which an *oriC:terC* ratio of 1 was assumed. RT-PCR results from antibiotic treated cells were normalized  
456 to the *oriC:terC* ratio of DNA samples (3 biological replicates) from non-treated cells. Calculations were  
457 performed in Microsoft Office Excel 2010, plotted using Prism 7 (GraphPad) and prepared for

458 publication in Corel Draw Suite X8. Significance was determined using a One-way ANOVA and a Tukey's  
459 test for multiple comparisons (GraphPad).

460

#### 461 *Growth and RNA isolation for RNA-Seq*

462 For RNA-Seq analysis, *C. difficile* 630 $\Delta$ erm (30, 31) was grown for 5h in BHI medium with HPUra (35  
463  $\mu$ g/mL) or ACX-362E (4  $\mu$ g/mL) starting from an OD<sub>600</sub> of 0.05 using an exponentially growing starter  
464 culture, after which cells (3mL) were harvested for RNA isolation. These concentrations were some of  
465 the highest concentrations that resulted in a modest effects on growth (<30% reduction of growth  
466 compared to wild type cells, **Supplemental Figure 1**). RNA isolation was performed with NucleoSpin<sup>®</sup>  
467 RNA kit (Macherey-Nagel). Although the kit includes on column rDNase digestion, a second treatment  
468 was performed in solution and RNA was precipitated and recovered by NaAc precipitation to remove  
469 residual DNA. Concentration determination and quality control (16S/23S ratio and RNA integrity number  
470 [RIN]) was performed with a fragment analyzer (Agilent bio-analyzer), according to the instructions of  
471 the manufacturer. Samples with a RIN>9 and 16S/23S ratio >1.4 were submitted for analysis by RNA-  
472 Seq.

473

#### 474 *RNA-Seq*

475 RNA-Seq was performed at a commercial provider (GenomeScan, Leiden, The Netherlands). In short,  
476 the NEBNext Ultra Directional RNA Library Prep Kit for Illumina was used to process the samples. Sample  
477 preparation was performed according to the protocol "NEBNext Ultra Directional RNA Library Prep Kit  
478 for Illumina" (NEB #E7420S/L). Briefly, after selective removal of rRNA (Ribo-Zero rRNA Removal Kit for  
479 gram-positive Bacteria) and fragmentation of the mRNA, cDNA synthesis was performed. cDNA was  
480 ligated to the sequencing adapters and the resulting product was PCR amplified. Clustering and DNA  
481 sequencing using the Illumina NextSeq 500 platform was performed according to manufacturer's

482 protocols. A concentration of 1.5 pM of DNA was used. Image analysis, base calling, and quality check  
483 was performed with the Illumina data analysis pipeline RTA vl.18.64 and Bcl2fastq v2.17. Per sample,  
484 four technical replicates were included in the RNA-Seq experiment. In case of insufficient reads, the  
485 sample was re-run on another flow cell to reach satisfactory quantities ( $\geq 20$  M).

486

#### 487 *Analysis of RNA-Seq data*

488 Analysis of the data was performed using T-REx, a user-friendly webserver which has been optimized for  
489 the analysis of prokaryotic RNAseq-derived expression data (73). The pipeline requires raw RNA  
490 expression level data as an input for RNA-Seq data analysis. For data normalisation and determination of  
491 the genes, the factorial design statistical method of the RNA-Seq analysis R-package EdgeR is  
492 implemented in the T-Rex pipeline. Some samples displayed incomplete rRNA depletion and rRNA  
493 mapping reads had to be removed manually prior to analysis.

494 To analyse the genome-wide pattern in differential gene expression a sliding window analysis  
495 was performed essentially as described (23). In short, genome locations (start of the locus tag) were  
496 coupled to the locus tags in the T-Rex output. Next, the median log(FC) was calculated for bins of 51 loci  
497 with a stepsize of 1. For each bin of  $[X_1, X_2 \dots X_{51}]$  the median absolute deviation of the median  
498 ( $MAD = \text{median}(|X_i - \text{median}(X)|)$ ) was calculated as a robust indication of the distribution around  
499 calculated median values. Calculations were performed and three curves (median, median-MAD and  
500 median+MAD) were plotted in Microsoft Office Excel 2010 and the graph was prepared for publication  
501 using Adobe Photoshop CC and Corel Draw Suite X8.

502 A GSEA analysis (33) was performed via the Genome2D webserver (73), using our reference  
503 genome sequence for *C. difficile* 630 $\Delta$ erm, Genbank identifier LN614756.1 (listed in Genome2D as  
504 "Clostridioides\_difficile\_630Derm")(31). As input a single list of locus tags was used of either up- or  
505 down regulated genes. The output was copied to Microsoft Excel 2010. The single\_list column was split,

506 and a column was inserted to calculate the significance of the overrepresentation using the formula “(#  
507 hits in list/ClassSize)\*-log(p-value; 2)” to allow for sorting of the output of the GSEA analysis by  
508 significance.

509 Data for the RNA-Seq experiment has been deposited in the Gene Expression Omnibus (GEO)  
510 database (74), accession number GSE116503.

511

### 512 *General molecular biological techniques*

513 *E. coli* strain DH5 $\alpha$  was used for maintenance of all plasmids. All plasmid transformations into *E. coli*  
514 were performed using standard procedures (75). *E. coli* CA434 was used as a donor for conjugation of  
515 plasmids into the recipient *C. difficile* (76). Conjugation was performed as previously described (76).  
516 Briefly, 1 mL of an overnight culture of donor cells was mixed with 200  $\mu$ l of the recipient and spotted  
517 onto anaerobic BHI agar plates and incubated for 5-8 hours. After incubation cells were collected and  
518 tenfold serial dilutions were plated onto fresh BHI plates containing thiamphenicol and CDSS.

519 Plasmid DNA was isolated using the Nucleospin Plasmid (Macherey-Nagel) mini prep kits per  
520 manufacturer’s instructions. *C. difficile* genomic DNA was isolated using the DNeasy Blood and Tissue kit  
521 (Qiagen) with pre-treatment for gram-positives according to instructions of the manufacturer.

522

### 523 *Construction of luciferase-reporter fusion plasmids*

524 All PCR reactions for plasmid construction were carried out with Q5 polymerase (New England Biolabs).  
525 Putative promoter regions were amplified using *C. difficile* 630 $\Delta$ *erm* chromosomal DNA (31) as a  
526 template.

527 The P<sub>CD3412</sub> luciferase reporter plasmid was created by restriction-ligation using the restriction  
528 enzymes *Kpn*I and *Sac*I. P<sub>CD3412</sub> was amplified using primers oIB-26 and oIB-27 (**Table 5**). The resulting  
529 dsDNA fragment was digested and ligated into *Kpn*I-*Sac*I digested pAP24 (44), yielding plasmid pIB27.

530 Plamids pIB68 (P<sub>CD0350</sub>), pIB69 (P<sub>CD2963</sub>), pIB74 (P<sub>CD3614</sub>) and pPH28 (P<sub>CD0007</sub>) were constructed using a  
531 Gibson assembly (77). The plasmid backbone of pAP24 was linearized by PCR using primers oWKS-  
532 1580/oWKS-1582, and the predicted promoter areas of CD0350, CD2963 and CD3614 were amplified  
533 with primers oIB-80/oIB-94, oIB-82/oIB-95, oIB-92/oIB-100 and oPH-19/oPH-20, respectively. Primers  
534 were designed using the NEBuilder assembly tool v.1.12.17 (New England Biolabs) using a 30 bp overlap.  
535 For the assembly, 100 ng of vector DNA was assembled to a five-fold molar excess of the PCR fragment  
536 of the desired promoter using a homemade Gibson Assembly Master Mix at 50°C for 30 minutes (final  
537 concentration: 4 U/μl Taq Ligase (Westburg), 0.004 U/μl T5 exonuclease (New England Biolabs), 0.025  
538 U/μl Phusion polymerase (Bioké), 5% polyethyleneglycol (PEG-8000), 10 mM MgCl<sub>2</sub>, 100 mM Tris-Cl  
539 pH=7.5, 10 mM dithiothreitol, 0.2 mM dATP, 0.2 mM dTTP, 0.2 mM dCTP, 0.2 mM dGTP, and 1 mM β-  
540 nicotinamide adenine dinucleotide) and transformed into *E. coli* DH5α. Transformants were screened by  
541 colony PCR using primers oWKS-1240 and oWKS-1241. Transformants yielding PCR fragments of the  
542 correct size were verified by Sanger sequencing.

543

#### 544 *Construction of C. difficile IB56 (ΔsigB)*

545 The up- and downstream regions (both 950 bp each) of the *sigB* coding sequence were amplified with  
546 primers oIB-44/oIB-45, and oIB-46/oIB-47, respectively. Vector pMTL-SC7315 (43) was linearized by PCR  
547 using primers oWKS-1537/oWKS-1538. Assembly was done according to the method of Gibson (44, 77).  
548 The assembled plasmid was transformed into *E. coli* DH5α and verified using PCR and Sanger  
549 sequencing. Generation of the unmarked *sigB* deletion mutant was performed using Allele-Coupled  
550 Exchange essentially as described (43, 78). Briefly, pIB54 was introduced into *C. difficile* 630Δ*erm* (31) by  
551 conjugation. Transconjugants were grown for two days on BHI agar plates supplemented with yeast  
552 extract, thiamphenicol and CDSS, struck onto fresh pre-reduced plates and incubated anaerobically at  
553 37°C for two days. Single-crossover integration was confirmed using PCR, and those clones were plated



554 onto non-selective BHI agar plates to allow the second-crossover event to occur. Colonies were then  
555 serially diluted and plated onto minimal agar supplemented with 50 µg/ml 5-fluorocytosine (Sigma) as  
556 described (43). DNA was isolated from thiamphenicol-susceptible colonies and the chromosomal  
557 deletion was verified by PCR using primers oIB-78/oIB-79 (**Supplemental Figure 3**) as well as Sanger  
558 sequencing of the PCR product using primers oIB-53/oIB-76/oIB-78.

559

#### 560 *Luciferase reporter assay*

561 Strains containing luciferase reporter plasmids were inoculated to an OD<sub>600</sub>=0.05 from an exponentially  
562 growing starter culture. Fresh inoculums were grown in BHI broth supplemented with yeast extract,  
563 with or without 4 µg/ml ACX-362E for 5 (for putative *sigB* target genes) or 5.5 (*sigB* promoter) hours.  
564 The supernatants from 1mL of culture (harvested by centrifugation for 10 min, 4°C, 8000 rpm) were  
565 analyzed in a GloMax®-Multi Microplate Multimode Reader (Promega) as described before (44).  
566 Statistical significance of the data (p<0.05) was determined by two-way analysis of variance (ANOVA)  
567 and a pairwise Tukey-Kramer test using Prism 7 (GraphPad) where appropriate.

568

#### 569 *Accession numbers*

570 GEO GSE116503; GenBank LN614756.1

571 **Author's contributions**

572 EVE, IMB, EJK and WKS designed experiments. GW and EJK provided reagents or strains. EVE, IMB and  
573 IMGJBS performed experiments. EVE, IMB and WKS analyzed data. EVE, IMB and WKS wrote the  
574 manuscript. All authors read and approved the manuscript.

575

576 **Acknowledgements**

577 This work was supported, in part, by a VIDI fellowship (864.13.003) from the Netherlands Organization  
578 for Scientific Research, a Gisela Thier Fellowship from the Leiden University Medical Center and  
579 intramural funds to WKS. Anne de Jong is acknowledged for expert assistance with the RNA-Seq analysis,  
580 Els Wessels for assistance in designing the MFA real-time PCR and Jelle Slager for helpful suggestions for  
581 the sliding window analysis.

582

583 **Conflict of interest**

584 EVE and WKS have performed research for Cubist. EJK has performed research for Cubist, Novartis and  
585 Qiagen, and has participated in advisory forums of Astellas, Optimer, Actelion, Pfizer, Sanofi Pasteur and  
586 Seres Therapeutics and currently holds an unrestricted research grant from Vedanta Biosciences Inc. GW  
587 is a consultant for Acurx Pharmaceuticals. The companies had no role in the design of the experiments  
588 or the decision to publish. IMB and IMGJSB: none to declare.

589

590 **References**

- 591 1. Lawson PA, Citron DM, Tyrrell KL, Finegold SM. 2016. Reclassification of *Clostridium difficile* as  
592 *Clostridioides difficile* (Hall and O'Toole 1935) Prevot 1938. *Anaerobe* 40:95-9.
- 593 2. Leffler DA, Lamont JT. 2015. *Clostridium difficile* infection. *N Engl J Med* 372:1539-48.
- 594 3. Smits WK, Lyras D, Lacy DB, Wilcox MH, Kuijper EJ. 2016. *Clostridium difficile* infection. *Nat Rev*  
595 *Dis Primers* 2:16020.
- 596 4. Abt MC, McKenney PT, Pamer EG. 2016. *Clostridium difficile* colitis: pathogenesis and host  
597 defence. *Nat Rev Microbiol* 14:609-20.
- 598 5. Anonymous (ed). 2006. Investigation into outbreaks of *Clostridium difficile* at Stoke Mandeville  
599 Hospital, Buckinghamshire Hospitals NHS Trust. Commission for Healthcare Audit and  
600 Inspection,
- 601 6. Bauer MP, Notermans DW, van Benthem BH, Brazier JS, Wilcox MH, Rupnik M, Monnet DL, van  
602 Dissel JT, Kuijper EJ, Group ES. 2011. *Clostridium difficile* infection in Europe: a hospital-based  
603 survey. *Lancet* 377:63-73.
- 604 7. Hensgens MP, Goorhuis A, Dekkers OM, Kuijper EJ. 2012. Time interval of increased risk for  
605 *Clostridium difficile* infection after exposure to antibiotics. *J Antimicrob Chemother* 67:742-8.
- 606 8. He M, Miyajima F, Roberts P, Ellison L, Pickard DJ, Martin MJ, Connor TR, Harris SR, Fairley D,  
607 Bamford KB, D'Arc S, Brazier J, Brown D, Coia JE, Douce G, Gerding D, Kim HJ, Koh TH, Kato H,  
608 Senoh M, Louie T, Michell S, Butt E, Peacock SJ, Brown NM, Riley T, Songer G, Wilcox M,  
609 Pirmohamed M, Kuijper E, Hawkey P, Wren BW, Dougan G, Parkhill J, Lawley TD. 2013.  
610 Emergence and global spread of epidemic healthcare-associated *Clostridium difficile*. *Nat Genet*  
611 45:109-13.
- 612 9. Debast SB, Bauer MP, Kuijper EJ, European Society of Clinical M, Infectious D. 2014. European  
613 Society of Clinical Microbiology and Infectious Diseases: update of the treatment guidance  
614 document for *Clostridium difficile* infection. *Clin Microbiol Infect* 20 Suppl 2:1-26.
- 615 10. McDonald LC, Gerding DN, Johnson S, Bakken JS, Carroll KC, Coffin SE, Dubberke ER, Garey KW,  
616 Gould CV, Kelly C, Loo V, Shaklee Sammons J, Sandora TJ, Wilcox MH. 2018. Clinical Practice  
617 Guidelines for *Clostridium difficile* Infection in Adults and Children: 2017 Update by the  
618 Infectious Diseases Society of America (IDSA) and Society for Healthcare Epidemiology of  
619 America (SHEA). *Clin Infect Dis* 66:e1-e48.
- 620 11. Baines SD, O'Connor R, Freeman J, Fawley WN, Harmanus C, Mastrantonio P, Kuijper EJ, Wilcox  
621 MH. 2008. Emergence of reduced susceptibility to metronidazole in *Clostridium difficile*. *J*  
622 *Antimicrob Chemother* 62:1046-52.
- 623 12. Chong PM, Lynch T, McCorrister S, Kibsey P, Miller M, Gravel D, Westmacott GR, Mulvey MR,  
624 Canadian Nosocomial Infection Surveillance P. 2014. Proteomic analysis of a NAP1 *Clostridium*  
625 *difficile* clinical isolate resistant to metronidazole. *PLoS One* 9:e82622.
- 626 13. Moura I, Spigaglia P, Barbanti F, Mastrantonio P. 2013. Analysis of metronidazole susceptibility  
627 in different *Clostridium difficile* PCR ribotypes. *J Antimicrob Chemother* 68:362-5.
- 628 14. Davies J, Spiegelman GB, Yim G. 2006. The world of subinhibitory antibiotic concentrations. *Curr*  
629 *Opin Microbiol* 9:445-53.
- 630 15. Slager J, Veening JW. 2016. Hard-Wired Control of Bacterial Processes by Chromosomal Gene  
631 Location. *Trends Microbiol* 24:788-800.
- 632 16. Tarantino PM, Jr., Zhi C, Wright GE, Brown NC. 1999. Inhibitors of DNA polymerase III as novel  
633 antimicrobial agents against gram-positive eubacteria. *Antimicrob Agents Chemother* 43:1982-7.
- 634 17. Brown NC. 1970. 6-(p-hydroxyphenylazo)-uracil: a selective inhibitor of host DNA replication in  
635 phage-infected *Bacillus subtilis*. *Proc Natl Acad Sci U S A* 67:1454-61.

- 636 18. Butler MM, Dudycz LW, Khan NN, Wright GE, Brown NC. 1990. Development of novel inhibitor  
637 probes of DNA polymerase III based on dGTP analogs of the HPUra type: base, nucleoside and  
638 nucleotide derivatives of N2-(3,4-dichlorobenzyl)guanine. *Nucleic Acids Res* 18:7381-7.
- 639 19. Torti A, Lossani A, Savi L, Focher F, Wright GE, Brown NC, Xu WC. 2011. Clostridium difficile DNA  
640 polymerase IIIC: basis for activity of antibacterial compounds. *Curr Enzym Inhib* 7:147-153.
- 641 20. Dvoskin S, Xu WC, Brown NC, Yanachkov IB, Yanachkova M, Wright GE. 2012. A novel agent  
642 effective against Clostridium difficile infection. *Antimicrob Agents Chemother* 56:1624-6.
- 643 21. Goranov AI, Katz L, Breier AM, Burge CB, Grossman AD. 2005. A transcriptional response to  
644 replication status mediated by the conserved bacterial replication protein DnaA. *Proc Natl Acad Sci U S A* 102:12932-7.
- 645 22. Goranov AI, Kuester-Schoeck E, Wang JD, Grossman AD. 2006. Characterization of the global  
646 transcriptional responses to different types of DNA damage and disruption of replication in  
647 Bacillus subtilis. *J Bacteriol* 188:5595-605.
- 648 23. Slager J, Kjos M, Attaiech L, Veening JW. 2014. Antibiotic-induced replication stress triggers  
649 bacterial competence by increasing gene dosage near the origin. *Cell* 157:395-406.
- 650 24. Knetsch CW, Terveer EM, Lauber C, Gorbalenya AE, Harmanus C, Kuijper EJ, Corver J, van  
651 Leeuwen HC. 2012. Comparative analysis of an expanded Clostridium difficile reference strain  
652 collection reveals genetic diversity and evolution through six lineages. *Infect Genet Evol*  
653 12:1577-85.
- 654 25. He M, Sebahia M, Lawley TD, Stabler RA, Dawson LF, Martin MJ, Holt KE, Seth-Smith HM, Quail  
655 MA, Rance R, Brooks K, Churcher C, Harris D, Bentley SD, Burrows C, Clark L, Corton C, Murray V,  
656 Rose G, Thurston S, van Tonder A, Walker D, Wren BW, Dougan G, Parkhill J. 2010. Evolutionary  
657 dynamics of Clostridium difficile over short and long time scales. *Proc Natl Acad Sci U S A*  
658 107:7527-32.
- 659 26. CLSI. 2012. Methods for Antimicrobial Susceptibility Testing of Anaerobic Bacteria; Approved  
660 Standard - Eighth edition, p 56, 8 ed. Clinical and Laboratory Standards Institute, Wayne, PA.
- 661 27. Freeman J, Stott J, Baines SD, Fawley WN, Wilcox MH. 2005. Surveillance for resistance to  
662 metronidazole and vancomycin in genotypically distinct and UK epidemic Clostridium difficile  
663 isolates in a large teaching hospital. *J Antimicrob Chemother* 56:988-9.
- 664 28. Debast SB, Bauer MP, Sanders IM, Wilcox MH, Kuijper EJ, Group ES. 2013. Antimicrobial activity  
665 of LFF571 and three treatment agents against Clostridium difficile isolates collected for a pan-  
666 European survey in 2008: clinical and therapeutic implications. *J Antimicrob Chemother*  
667 68:1305-11.
- 668 29. Pacitti DF, Barnes MH, Li DH, Brown NC. 1995. Characterization and overexpression of the gene  
669 encoding Staphylococcus aureus DNA polymerase III. *Gene* 165:51-6.
- 670 30. Hussain HA, Roberts AP, Mullany P. 2005. Generation of an erythromycin-sensitive derivative of  
671 Clostridium difficile strain 630 (630Deltaerm) and demonstration that the conjugative  
672 transposon Tn916DeltaE enters the genome of this strain at multiple sites. *J Med Microbiol*  
673 54:137-41.
- 674 31. van Eijk E, Anvar SY, Browne HP, Leung WY, Frank J, Schmitz AM, Roberts AP, Smits WK. 2015.  
675 Complete genome sequence of the Clostridium difficile laboratory strain 630Deltaerm reveals  
676 differences from strain 630, including translocation of the mobile element CTn5. *BMC Genomics*  
677 16:31.
- 678 32. Hasteley CJ, Dale SE, Nary J, Citron D, Law JH, Roe-Carpenter DE, Chesnel L. 2017. Comparison of  
679 Clostridium difficile minimum inhibitory concentrations obtained using agar dilution vs broth  
680 microdilution methods. *Anaerobe* 44:73-77.
- 681 33. Subramanian A, Tamayo P, Mootha VK, Mukherjee S, Ebert BL, Gillette MA, Paulovich A,  
682 Pomeroy SL, Golub TR, Lander ES, Mesirov JP. 2005. Gene set enrichment analysis: a knowledge-

- 684 based approach for interpreting genome-wide expression profiles. Proc Natl Acad Sci U S A  
685 102:15545-50.
- 686 34. Anonymous. Genome2D web server. <http://genome2d.molgenrug.nl>. Accessed  
687 35. van Eijk E, Paschalis V, Green M, Friggen AH, Larson MA, Spriggs K, Briggs GS, Soultanas P, Smits  
688 WK. 2016. Primase is required for helicase activity and helicase alters the specificity of primase  
689 in the enteropathogen *Clostridium difficile*. Open Biol 6.
- 690 36. Sousa C, de Lorenzo V, Cebolla A. 1997. Modulation of gene expression through chromosomal  
691 positioning in *Escherichia coli*. Microbiology 143 ( Pt 6):2071-8.
- 692 37. Sauer C, Syvertsson S, Bohorquez LC, Cruz R, Harwood CR, van Rij T, Hamoen LW. 2016. Effect of  
693 Genome Position on Heterologous Gene Expression in *Bacillus subtilis*: An Unbiased Analysis.  
694 ACS Synth Biol 5:942-7.
- 695 38. Block DH, Hussein R, Liang LW, Lim HN. 2012. Regulatory consequences of gene translocation in  
696 bacteria. Nucleic Acids Res 40:8979-92.
- 697 39. Samadpour AN, Merrikh H. 2018. DNA gyrase activity regulates DnaA-dependent replication  
698 initiation in *Bacillus subtilis*. Mol Microbiol 108:115-127.
- 699 40. Sebahia M, Wren BW, Mullany P, Fairweather NF, Minton N, Stabler R, Thomson NR, Roberts  
700 AP, Cerdano-Tarraga AM, Wang H, Holden MT, Wright A, Churcher C, Quail MA, Baker S, Bason  
701 N, Brooks K, Chillingworth T, Cronin A, Davis P, Dowd L, Fraser A, Feltwell T, Hance Z, Holroyd S,  
702 Jagels K, Moule S, Mungall K, Price C, Rabinowitsch E, Sharp S, Simmonds M, Stevens K, Unwin  
703 L, Whithead S, Dupuy B, Dougan G, Barrell B, Parkhill J. 2006. The multidrug-resistant human  
704 pathogen *Clostridium difficile* has a highly mobile, mosaic genome. Nat Genet 38:779-86.
- 705 41. Kint N, Janoir C, Monot M, Hoys S, Soutourina O, Dupuy B, Martin-Verstraete I. 2017. The  
706 alternative sigma factor sigma(B) plays a crucial role in adaptive strategies of *Clostridium difficile*  
707 during gut infection. Environ Microbiol 19:1933-1958.
- 708 42. Hecker M, Pane-Farre J, Volker U. 2007. SigB-dependent general stress response in *Bacillus*  
709 *subtilis* and related gram-positive bacteria. Annu Rev Microbiol 61:215-36.
- 710 43. Cartman ST, Kelly ML, Heeg D, Heap JT, Minton NP. 2012. Precise manipulation of the  
711 *Clostridium difficile* chromosome reveals a lack of association between the *tcdC* genotype and  
712 toxin production. Appl Environ Microbiol 78:4683-90.
- 713 44. Oliveira Paiva AM, Friggen AH, Hossein-Javaheri S, Smits WK. 2016. The Signal Sequence of the  
714 Abundant Extracellular Metalloprotease PPEP-1 Can Be Used to Secrete Synthetic Reporter  
715 Proteins in *Clostridium difficile*. ACS Synth Biol 5:1376-1382.
- 716 45. Lynch T, Chong P, Zhang J, Hizon R, Du T, Graham MR, Beniac DR, Booth TF, Kibsey P, Miller M,  
717 Gravel D, Mulvey MR, Canadian Nosocomial Infection Surveillance P. 2013. Characterization of a  
718 stable, metronidazole-resistant *Clostridium difficile* clinical isolate. PLoS One 8:e53757.
- 719 46. Goldstein EJ, Citron DM, Sears P, Babakhani F, Sambol SP, Gerding DN. 2011. Comparative  
720 susceptibilities to fidaxomicin (OPT-80) of isolates collected at baseline, recurrence, and failure  
721 from patients in two phase III trials of fidaxomicin against *Clostridium difficile* infection.  
722 Antimicrob Agents Chemother 55:5194-9.
- 723 47. Knetsch CW, Kumar N, Forster SC, Connor TR, Browne HP, Harmanus C, Sanders IM, Harris SR,  
724 Turner L, Morris T, Perry M, Miyajima F, Roberts P, Pirmohamed M, Songer JG, Weese JS, Indra  
725 A, Corver J, Rupnik M, Wren BW, Riley TV, Kuijper EJ, Lawley TD. 2018. Zoonotic Transfer of  
726 *Clostridium difficile* Harboring Antimicrobial Resistance between Farm Animals and Humans. J  
727 Clin Microbiol 56.
- 728 48. Ott RW, Barnes MH, Brown NC, Ganesan AT. 1986. Cloning and characterization of the *polC*  
729 region of *Bacillus subtilis*. J Bacteriol 165:951-7.

- 730 49. Barnes MH, Hammond RA, Foster KA, Mitchener JA, Brown NC. 1989. The cloned polC gene of  
731 *Bacillus subtilis*: characterization of the azp12 mutation and controlled in vitro synthesis of  
732 active DNA polymerase III. *Gene* 85:177-86.
- 733 50. Barnes MH, Hammond RA, Kennedy CC, Mack SL, Brown NC. 1992. Localization of the  
734 exonuclease and polymerase domains of *Bacillus subtilis* DNA polymerase III. *Gene* 111:43-9.
- 735 51. Barnes MH, Butler MM, Wright GE, Brown NC. 2012. Antimicrobials targeted to the replication-  
736 specific DNA polymerases of gram-positive bacteria: target potential of dnaE. *Infect Disord Drug*  
737 *Targets* 12:327-31.
- 738 52. Timinskas K, Balvociute M, Timinskas A, Venclovas C. 2014. Comprehensive analysis of DNA  
739 polymerase III alpha subunits and their homologs in bacterial genomes. *Nucleic Acids Res*  
740 42:1393-413.
- 741 53. Wecke T, Mascher T. 2011. Antibiotic research in the age of omics: from expression profiles to  
742 interspecies communication. *J Antimicrob Chemother* 66:2689-704.
- 743 54. Kazmierczak MJ, Mithoe SC, Boor KJ, Wiedmann M. 2003. *Listeria monocytogenes* sigma B  
744 regulates stress response and virulence functions. *J Bacteriol* 185:5722-34.
- 745 55. Weber H, Polen T, Heuveling J, Wendisch VF, Hengge R. 2005. Genome-wide analysis of the  
746 general stress response network in *Escherichia coli*: sigmaS-dependent genes, promoters, and  
747 sigma factor selectivity. *J Bacteriol* 187:1591-603.
- 748 56. van Schaik W, van der Voort M, Molenaar D, Moezelaar R, de Vos WM, Abee T. 2007.  
749 Identification of the sigmaB regulon of *Bacillus cereus* and conservation of sigmaB-regulated  
750 genes in low-GC-content gram-positive bacteria. *J Bacteriol* 189:4384-90.
- 751 57. Kreuzer KN. 2013. DNA damage responses in prokaryotes: regulating gene expression,  
752 modulating growth patterns, and manipulating replication forks. *Cold Spring Harb Perspect Biol*  
753 5:a012674.
- 754 58. Helmann JD, Wu MF, Kobel PA, Gamo FJ, Wilson M, Morshedi MM, Navre M, Paddon C. 2001.  
755 Global transcriptional response of *Bacillus subtilis* to heat shock. *J Bacteriol* 183:7318-28.
- 756 59. Ternan NG, Jain S, Srivastava M, McMullan G. 2012. Comparative transcriptional analysis of  
757 clinically relevant heat stress response in *Clostridium difficile* strain 630. *PLoS One* 7:e42410.
- 758 60. Emerson JE, Stabler RA, Wren BW, Fairweather NF. 2008. Microarray analysis of the  
759 transcriptional responses of *Clostridium difficile* to environmental and antibiotic stress. *J Med*  
760 *Microbiol* 57:757-64.
- 761 61. Walter BM, Rupnik M, Hodnik V, Anderluh G, Dupuy B, Paulic N, Zgur-Bertok D, Butala M. 2014.  
762 The LexA regulated genes of the *Clostridium difficile*. *BMC Microbiol* 14:88.
- 763 62. Walter BM, Cartman ST, Minton NP, Butala M, Rupnik M. 2015. The SOS Response Master  
764 Regulator LexA Is Associated with Sporulation, Motility and Biofilm Formation in *Clostridium*  
765 *difficile*. *PLoS One* 10:e0144763.
- 766 63. Jain S, Graham C, Graham RL, McMullan G, Ternan NG. 2011. Quantitative proteomic analysis of  
767 the heat stress response in *Clostridium difficile* strain 630. *J Proteome Res* 10:3880-90.
- 768 64. Ternan NG, Jain S, Graham RL, McMullan G. 2014. Semiquantitative analysis of clinical heat  
769 stress in *Clostridium difficile* strain 630 using a GeLC/MS workflow with emPAI quantitation.  
770 *PLoS One* 9:e88960.
- 771 65. Soler-Bistue A, Mondotte JA, Bland MJ, Val ME, Saleh MC, Mazel D. 2015. Genomic location of  
772 the major ribosomal protein gene locus determines *Vibrio cholerae* global growth and  
773 infectivity. *PLoS Genet* 11:e1005156.
- 774 66. Couturier E, Rocha EP. 2006. Replication-associated gene dosage effects shape the genomes of  
775 fast-growing bacteria but only for transcription and translation genes. *Mol Microbiol* 59:1506-  
776 18.

- 777 67. Bidet P, Lalande V, Salauze B, Burghoffer B, Avesani V, Delmee M, Rossier A, Barbut F, Petit JC.  
778 2000. Comparison of PCR-ribotyping, arbitrarily primed PCR, and pulsed-field gel electrophoresis  
779 for typing *Clostridium difficile*. *J Clin Microbiol* 38:2484-7.
- 780 68. Kato H, Kato N, Watanabe K, Iwai N, Nakamura H, Yamamoto T, Suzuki K, Kim SM, Chong Y,  
781 Wasito EB. 1998. Identification of toxin A-negative, toxin B-positive *Clostridium difficile* by PCR. *J*  
782 *Clin Microbiol* 36:2178-82.
- 783 69. Paltansing S, van den Berg RJ, Guseinova RA, Visser CE, van der Vorm ER, Kuijper EJ. 2007.  
784 Characteristics and incidence of *Clostridium difficile*-associated disease in The Netherlands,  
785 2005. *Clin Microbiol Infect* 13:1058-64.
- 786 70. Stubbs S, Rupnik M, Gibert M, Brazier J, Duerden B, Popoff M. 2000. Production of actin-specific  
787 ADP-ribosyltransferase (binary toxin) by strains of *Clostridium difficile*. *FEMS Microbiol Lett*  
788 186:307-12.
- 789 71. Anonymous. American Type Culture Collection.
- 790 72. Anonymous. DNAPlotter. <http://www.sanger.ac.uk/science/tools/dnaplotter>. Accessed
- 791 73. de Jong A, van der Meulen S, Kuipers OP, Kok J. 2015. T-REx: Transcriptome analysis webserver  
792 for RNA-seq Expression data. *BMC Genomics* 16:663.
- 793 74. Anonymous. Gene Expression Omnibus (GEO). <https://www.ncbi.nlm.nih.gov/geo/>. Accessed
- 794 75. Sambrook J, Russell DW. 2001. *Molecular cloning : a laboratory manual*. Cold Spring Harbor  
795 Laboratory, Cold Spring Harbor, N.Y.
- 796 76. Purdy D, O'Keeffe TA, Elmore M, Herbert M, McLeod A, Bokori-Brown M, Ostrowski A, Minton  
797 NP. 2002. Conjugative transfer of clostridial shuttle vectors from *Escherichia coli* to *Clostridium*  
798 *difficile* through circumvention of the restriction barrier. *Mol Microbiol* 46:439-52.
- 799 77. Gibson DG, Young L, Chuang RY, Venter JC, Hutchison CA, 3rd, Smith HO. 2009. Enzymatic  
800 assembly of DNA molecules up to several hundred kilobases. *Nat Methods* 6:343-5.
- 801 78. van Leeuwen PT, van der Peet JM, Bikker FJ, Hoogenkamp MA, Oliveira Paiva AM, Kostidis S,  
802 Mayboroda OA, Smits WK, Krom BP. 2016. Interspecies Interactions between *Clostridium*  
803 *difficile* and *Candida albicans*. *mSphere* 1.

804

805

806 **Tables**

807

808 **Table 1.** Minimal inhibitory concentrations of PolC-inhibitors towards *C. difficile* stratified by clade.

809

810 **Table 2.** List of the genes most highly up- and down-regulated in the presence of HPUra compared to  
811 non-treated cells.

812

813 **Table 3.** List of the genes most highly up- and down-regulated in the presence of ACX-362E compared to  
814 non-treated cells.

815

816 **Table 4.** Plasmids and strains used in this study.

817

818 **Table 5.** Oligonucleotides and probes used in this study.

819

820

821

822

823

824

825

826

827

828



829 **Figures**

830

831 **Figure 1. Mechanism of action of the PolC-inhibitors ACX-362E. A.** Ternary complex of inhibitor ACX-  
832 362E, DNA ,and PolC. **B.** H-bonding between inhibitor molecule ACX-362E and a cytosine residue of  
833 DNA.

834

835 **Figure 2. Minimal inhibitory concentrations of PolC-inhibitors.** MIC was determined by agar dilution  
836 according to CLSI standards (26) and is expressed in µg/mL. The distribution in the MIC for the collection  
837 of clinical isolates (N=363) is given for the PolC-inhibitors HPUra (blue) and ACX-362E (red).

838

839 **Figure 3. Overlap in the transcriptional response to different PolC-inhibitors. A.** Venn diagram of the  
840 number of genes up-regulated in the presence of ACX-362E (red), in the presence of HPUra (blue) or  
841 under both conditions (overlapping region). **B.** Venn diagram of the number of genes down-regulated in  
842 the presence of ACX-362E (red), in the presence of HPUra (blue) or under both conditions (overlapping  
843 region). The size of the circles is proportional to the number of genes that showed differential  
844 expression.

845

846 **Figure 4. Genome location correlates with differential expression upon PolC inhibition. A.** Schematic  
847 representation of the chromosome of *C. difficile*. Higher than average GC skew ( $[(G - C)/(G + C)]$ ) (red) and  
848 lower than average GC skew (blue) were calculated with DNAPlotter (72). Vertical lines indicate the  
849 position of the predicted origin (*oriC*) and terminus (*terC*) of replication. Arrows indicate the direction of  
850 replication. **B.** Sliding window analysis (bins of 51 loci, stepsize 1) of the median log fold change (FC)  
851 projected on a linear genome map. The *oriC* of the circular chromosome is located on either size of the  
852 linear graph (0/4.29Mb), whereas *terC* is indicated with a vertical red line. The trend in  $\log(\text{FC})$  is  
853 highlighted using a green line. Light blue shading indicates the median absolute deviation of the mean  
854 (23).

855

856 **Figure 5. Polymerase inhibitors lead to an increase in *oriC:terC* ratio.** A marker frequency analysis of  
857 the effects of sub-inhibitory amounts of polymerase inhibitors (red; HPUra: 35  $\mu\text{g}/\text{mL}$ ; ACX-362E: 4  
858  $\mu\text{g}/\text{mL}$ ) and three antibiotics with different modes of action (blue; metronidazole: 0.25  $\mu\text{g}/\text{mL}$ ;  
859 fidaxomicin: 0.00125  $\mu\text{g}/\text{mL}$ , surotomycin: 0.625  $\mu\text{g}/\text{mL}$ ) compared to non-treated cells (black).  
860 Datapoints are averages of technical replicates (N=3). Black lines behind the datapoints indicate the  
861 average of the biological replicates (N=3) and whiskers indicate the standard deviation of the mean.  
862 Data have been normalized compared to the non-treated control. The mean of HPUra and ACX-362E  
863 treated samples is statistically different from the other samples ( $p < 0.0001$ ).

864

865 **Figure 6. The *sigB* operon is transiently induced upon exposure to ACX-362E.** The putative promoter of  
866 the *sigB* operon (41) was fused transcriptionally to a plasmid-based luciferase reporter (44). Luciferase  
867 activity was measured regularly between 30 mins and 5.5h of growth in liquid medium in the presence  
868 (+362E) or absence (no Ab) of polymerase inhibitor ACX-362E.

869

870 **Figure 7. Genes differentially expressed due to polymerase inhibitors are regulated by  $\sigma^B$ .** The putative  
871 promoters of the indicated genes were fused transcriptionally to a plasmid-based luciferase reporter  
872 (44). Luciferase activity was measured after 5 h of growth in liquid medium in the presence (+362E) or  
873 absence (no Ab) of polymerase inhibitor ACX-362E. N.S. = non-significant, \*= $p < 0.05$ , \*\*= $p < 0.005$ ,  
874 \*\*\*= $p < 0.0005$ , \*\*\*\*= $p < 0.00005$ . **A.** P<sub>CD350</sub>-*sLuc*<sup>opt</sup>. **B.** P<sub>CD2963</sub>-*sLuc*<sup>opt</sup> **C.** P<sub>CD3614</sub>-*sLuc*<sup>opt</sup> **D.** P<sub>CD3412</sub>-*sLuc*<sup>opt</sup>.

875

876 **Supplemental information**

877

878 **Supplemental Table 1.** Characteristics and minimal inhibitory concentrations of the clinical isolates used  
879 in the agar dilution experiments.

880 **Supplemental Table 2.** Lists of the genes that are differentially expressed in the presence of PolC-  
881 inhibitors compared to non-treated cells. **A.** HPUra differentially expressed genes. **B.** ACX-362E  
882 differentially expressed genes.

883 **Supplemental Table 3.** Overlap with published  $\sigma^B$  regulon. **A.**  $\sigma^B$ -dependent stress response genes  
884 differentially regulated in the ACX-362E dataset. **B.** Genes containing a  $\sigma^B$  consensus promoter  
885 differentially regulated in the ACX-362E dataset.

886 **Supplemental Figure 1.** Inhibition of growth by varying concentrations of PolC-inhibitors.

887 **Supplemental Figure 2.** Chloramphenicol does not result in a gene dosage shift.

888 **Supplemental Figure 3.** Confirmation of the *sigB* mutant strain (IB56).

889

890 Supplemental information is also available from Figshare (10.6084/m9.figshare.7117463).

**A.**

Figure 1

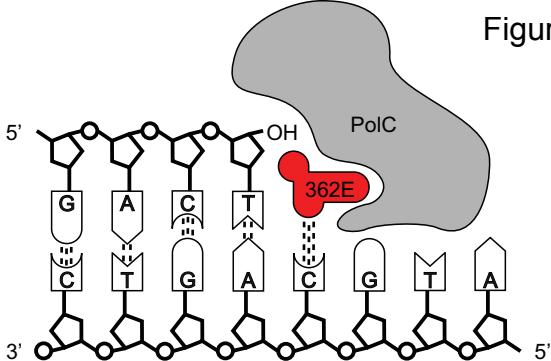**B.**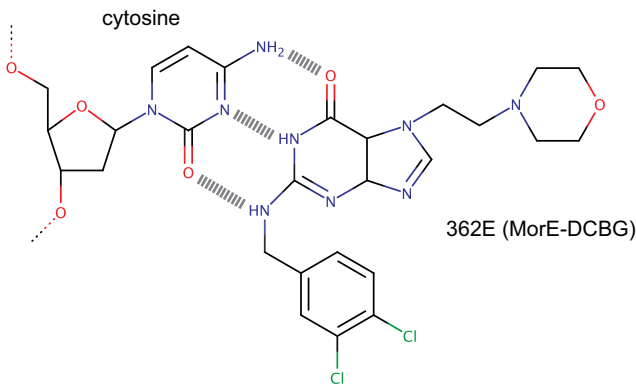

Figure 2

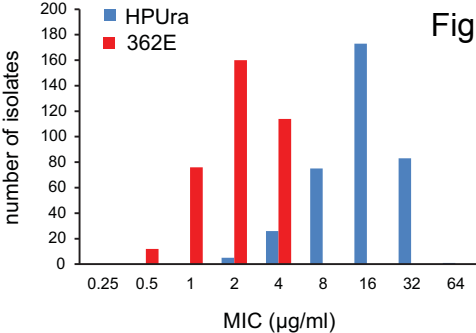

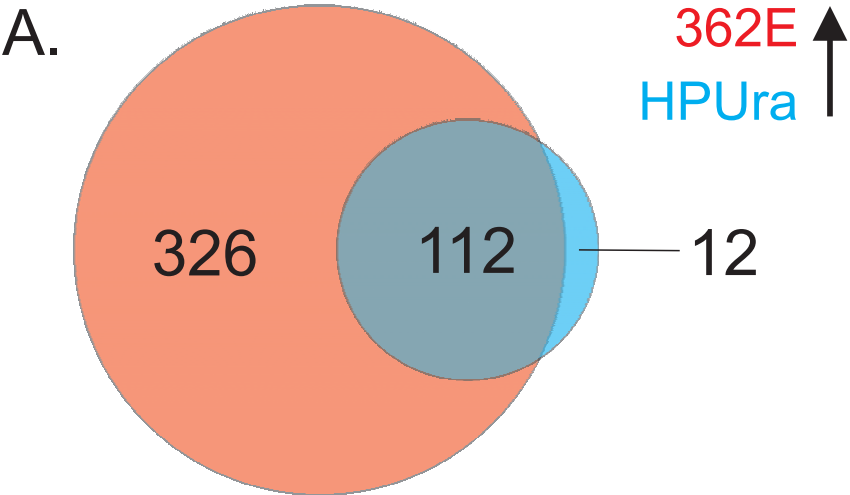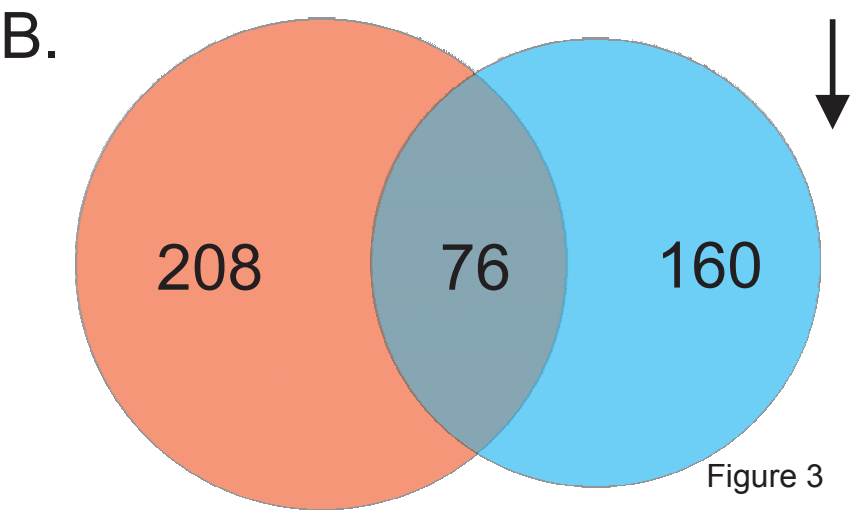

Figure 3

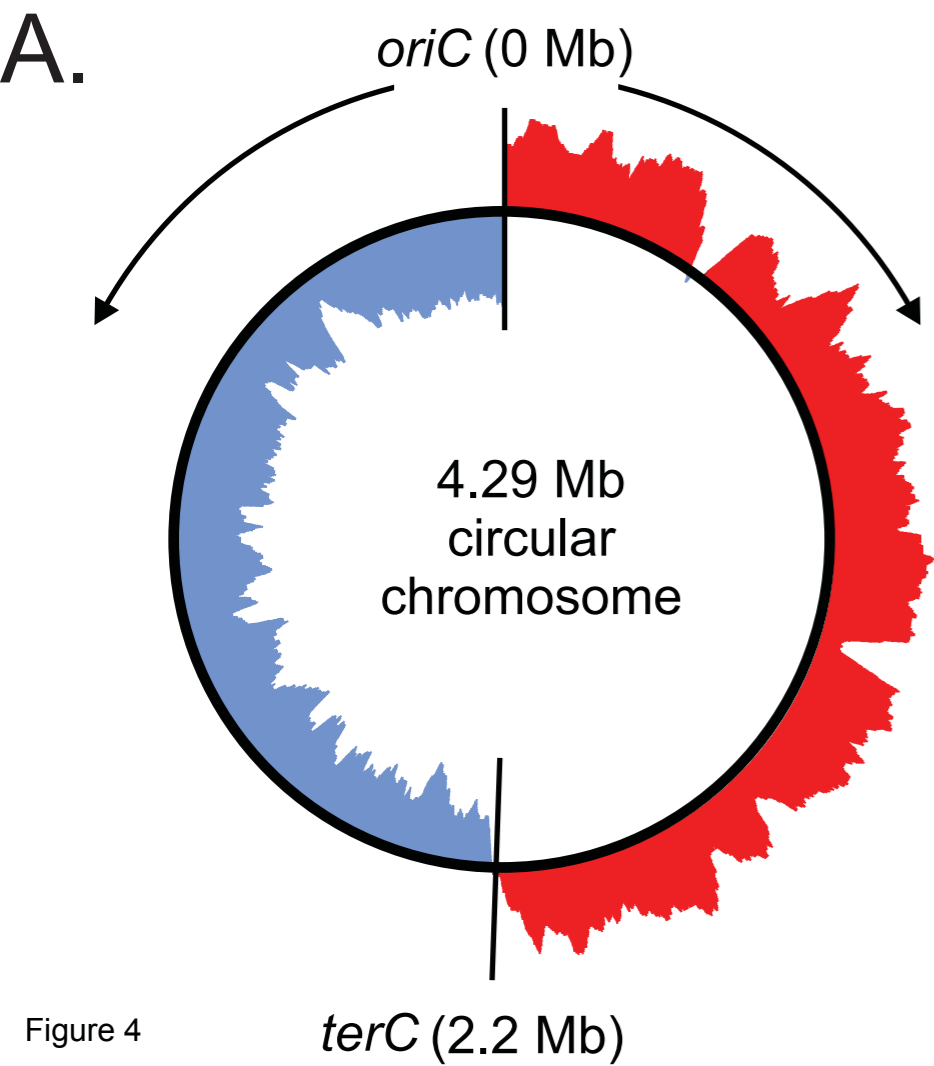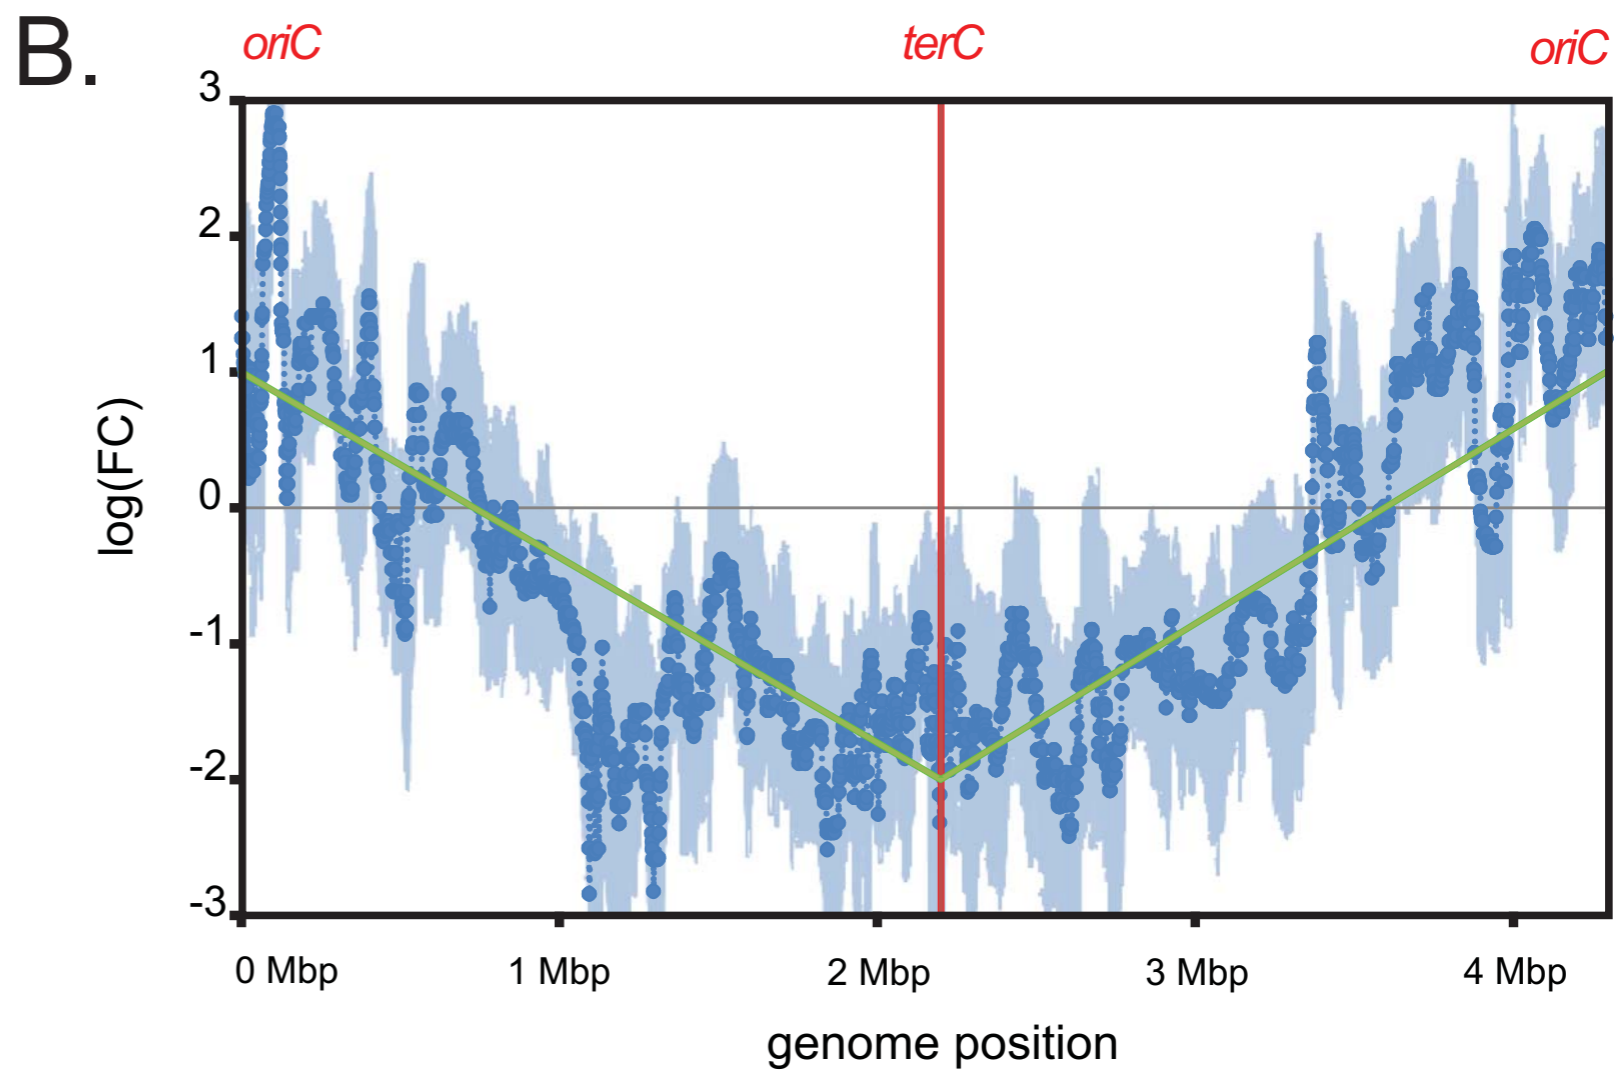

Figure 4



Figure 5

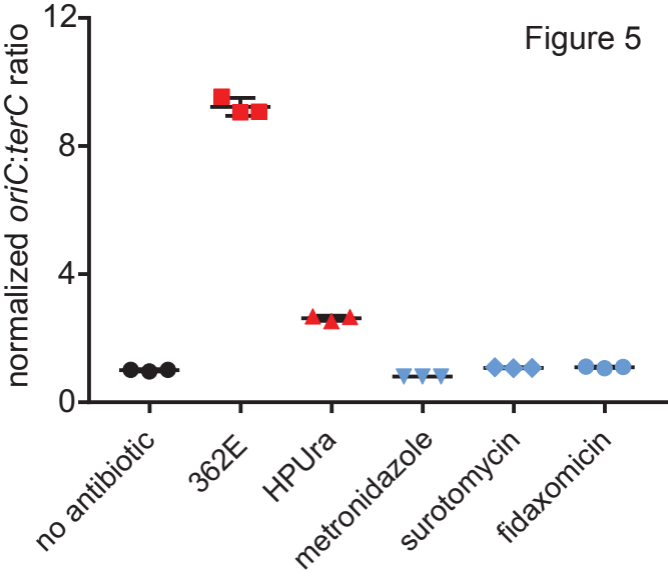

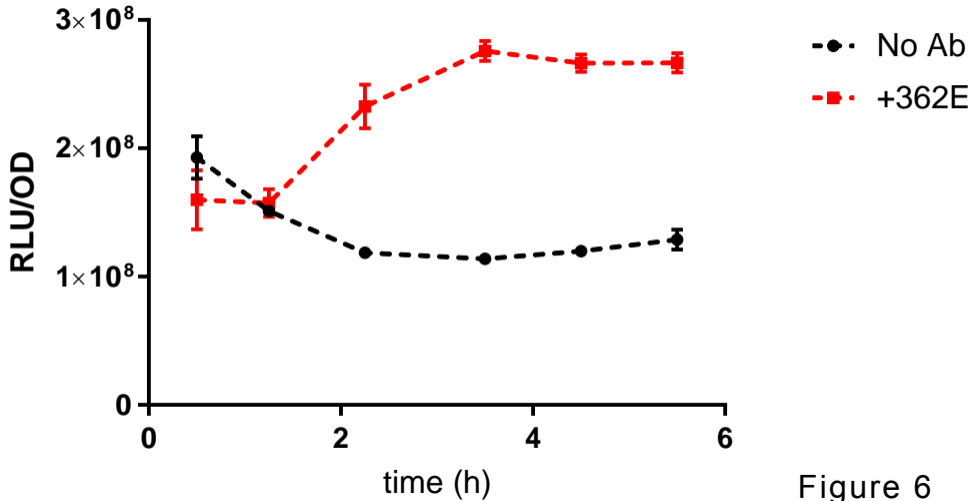

Figure 6

A

CD0350

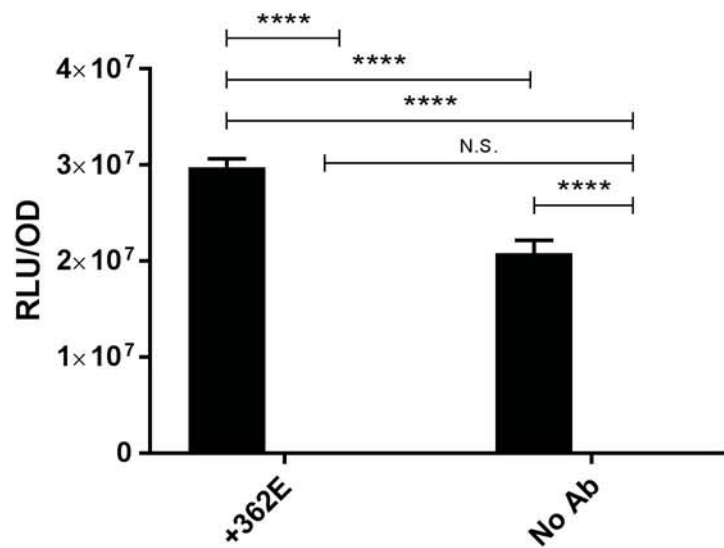

B

CD2963

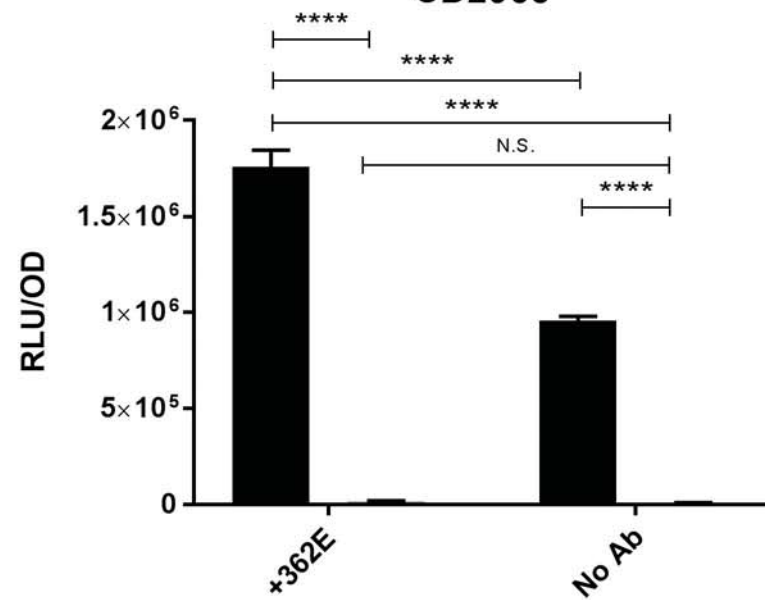

■ Wildtype  
 ■  $\Delta sigB$

C

CD3614

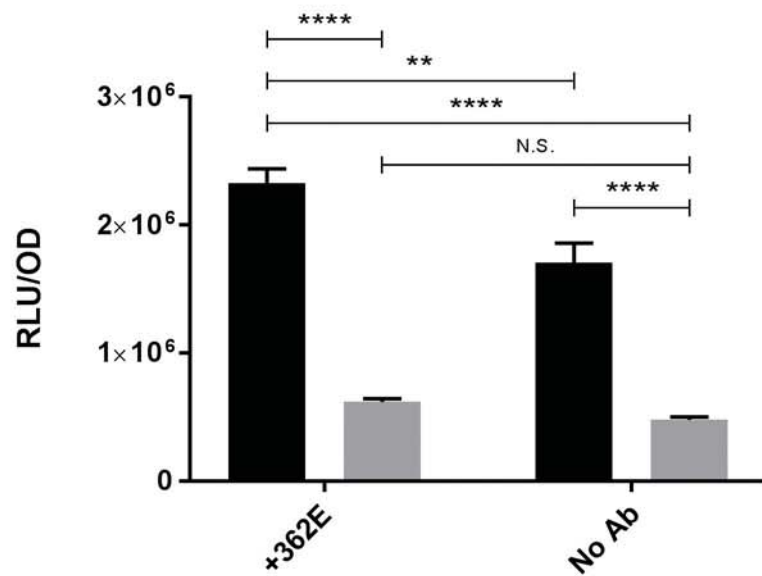

D

CD3412

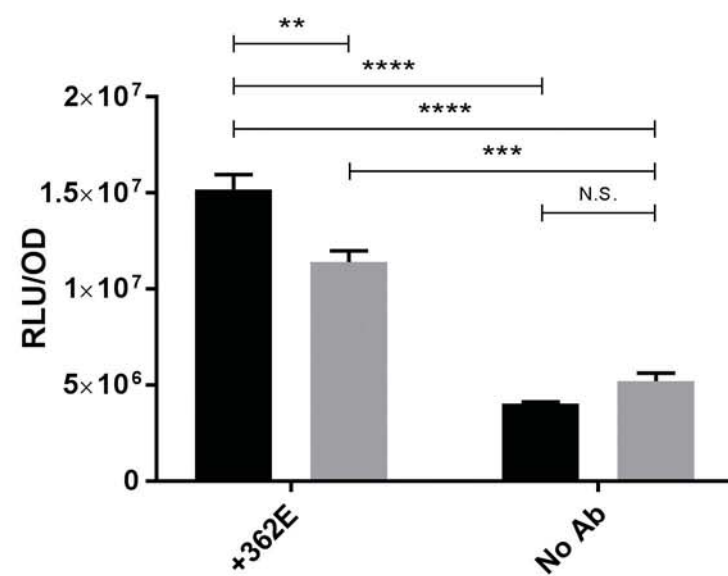

Source: https://www.biorxiv.org/content/10.1101/362137v3.full.pdf
